# Supplementary material for: HSPS-10—Short Version of the Highly Sensitive Person Scale for Students Aged 12–25 Years
Source: MDPI journal article supplement (doi:10.3390/ijerph192315775), 2022-11-27
Supplement: s1 [file s1]

## Supplementary Materials

Table S1: HSPS-10 QUESTIONS

Data badania .....

### Kwestionariusz HSPS-10

*SHORT POLISH VERSION OF THE HIGHLY SENSITIVE PERSON SCALE*

*KWESTIONARIUSZ OSOBA WYSOKO WRAŻLIWA – POLSKA SKRÓCONA WERSJA*

(Autor: E.N. Aron; polska adaptacja: Monika Baryła-Matejczuk, Wiesław Poleszak, Robert Porzak)

.....  
Wiek

.....  
Płeć

INSTRUKCJE: Odpowiedz na każde pytanie zgodnie z tym jak się czujesz, używając następującej skali:

|                                                                                                                                                                   | 1            | 2 | 3 | 4            | 5 | 6 | 7                |
|-------------------------------------------------------------------------------------------------------------------------------------------------------------------|--------------|---|---|--------------|---|---|------------------|
|                                                                                                                                                                   | Zupełnie nie |   |   | Umiarkowanie |   |   | Zdecydowanie tak |
| 1. Czy masz bogate, złożone życie wewnętrzne?                                                                                                                     | 1            | 2 | 3 | 4            | 5 | 6 | 7                |
| 2. Czy drażnią cię głośne dźwięki?                                                                                                                                | 1            | 2 | 3 | 4            | 5 | 6 | 7                |
| 3. Czy głęboko przeżywasz sztukę lub muzykę?                                                                                                                      | 1            | 2 | 3 | 4            | 5 | 6 | 7                |
| 4. Czy denerwujesz się kiedy musisz zrobić dużo rzeczy jednocześnie?                                                                                              | 1            | 2 | 3 | 4            | 5 | 6 | 7                |
| 5. Czy drażni Cię kiedy inni chcą od Ciebie zbyt wiele rzeczy na raz?                                                                                             | 1            | 2 | 3 | 4            | 5 | 6 | 7                |
| 6. Czy zmiany w Twoim życiu dezorganizują Cię?                                                                                                                    | 1            | 2 | 3 | 4            | 5 | 6 | 7                |
| 7. Czy zwracasz uwagę i cieszysz się z delikatnych lub pięknych zapachów, smaków, dźwięków lub dzieł sztuki?                                                      | 1            | 2 | 3 | 4            | 5 | 6 | 7                |
| 8. Czy źle się czujesz gdy trzeba robić wiele rzeczy jednocześnie?                                                                                                | 1            | 2 | 3 | 4            | 5 | 6 | 7                |
| 9. Czy przeszkadzają ci intensywne bodźce np. głośne dźwięki lub chaos?                                                                                           | 1            | 2 | 3 | 4            | 5 | 6 | 7                |
| 10. Czy stajesz się nerwowy i niepewny, a w efekcie osiągasz gorsze wyniki wtedy, gdy ktoś Ciebie obserwuje podczas rywalizacji lub wykonywania jakiegoś zadania? | 1            | 2 | 3 | 4            | 5 | 6 | 7                |
